# Supplementary material for: Comparative Analysis of Microbial and Mycotoxin Contamination in Korean Traditional Soybean Paste and Soy Sauce Production with and without Starter
Source: MDPI journal article supplement (doi:10.3390/fermentation9070621), 2023-06-29
Supplement: s1 [file s1]

## Supplementary Materials:

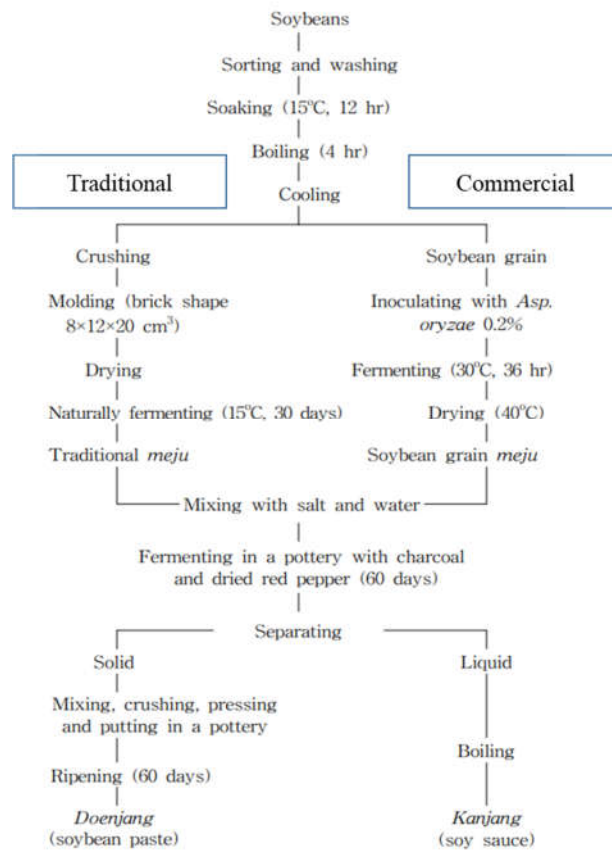

Supplementary Figure S1. Methods for the manufacture of Doenjang and Ganjang

**Supplementary Table S1.** Conditions for HPLC-FLD.

|                         |                                                         |       |       |
|-------------------------|---------------------------------------------------------|-------|-------|
| <b>Instrument</b>       | Jasco HPLC 2000 series (Japan)                          |       |       |
| <b>Column</b>           | Capcell pak - C18 (4.6 × 250 mm, 5 μm)                  |       |       |
| <b>Mobile phase</b>     | A: Water : Acetonitrile : Methanol = 72:14:14           |       |       |
|                         | B: Acetonitrile : 0.1% Phosphoric acid in Water = 50:50 |       |       |
| <b>Gradient</b>         | Time (min)                                              | A (%) | B (%) |
|                         | 0                                                       | 95    | 5     |
|                         | 30                                                      | 95    | 5     |
|                         | 34                                                      | 50    | 50    |
|                         | 36                                                      | 5     | 95    |
|                         | 44                                                      | 5     | 95    |
|                         | 47                                                      | 95    | 5     |
|                         | 50                                                      | 95    | 5     |
| <b>Injection volume</b> | 20 μL                                                   |       |       |
| <b>Flow rate</b>        | 1.0 mL/min                                              |       |       |
| <b>Temperature</b>      | 40 °C                                                   |       |       |
| <b>Run time</b>         | 50 min                                                  |       |       |
| <b>Wavelength</b>       | 0 – 30 min Ex 360, Em 455 nm /                          |       |       |
|                         | 30 – 50 min Ex 330, Em 460 nm                           |       |       |
